# Supplementary material
Source: publisher site journal article supplement (https://www.kjim.org/upload/media/kjim-2019-098-suppl2.pdf)
Supplement: Supplementary file 1 [file kjim-2019-098-suppl2.pdf]

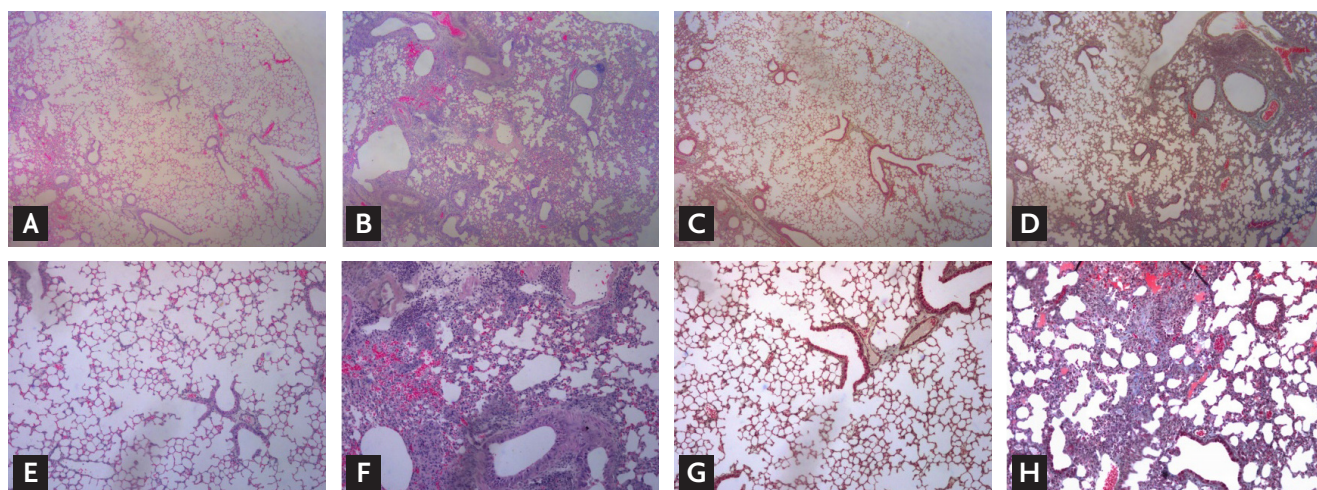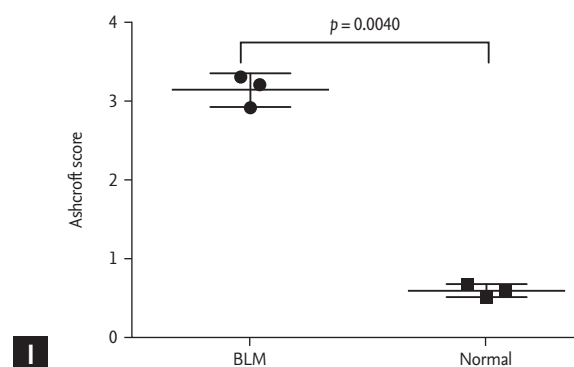

**Supplementary Figure 1.** Representative histological lung sections from normal and bleomycin (BLM) group at day 18. (A, E) Normal group, stained with H&E stain, (B, F) BLM group, stained with H&E stain, (C, G) normal group with Masson's trichrome stain, (D, H) BLM group with Masson's trichrome stain (A-D:  $\times 40$ ; E-H:  $\times 100$ ). (I) Semi-quantitative analyses of lung tissue for each group using the Ashcroft score. BLM induced significant alveolar wall thickening, increased inflammatory cells infiltration and collagen deposit.
